# Supplementary material
Source: PubMed Central journal article supplement (PMC1636478)
Supplement: nar_gkl691_1.pdf [file nar_gkl691_1.pdf]

## **Supplementary Figure Legends:**

### **Figure 1. Sumoylation of PRB and effects of SUMO-1 on PRB-mediated gene transcription activation.**

(A) 293T cells were transiently transfected with pMMTV luciferase reporter construct, Myc-PRB vectors and increasing amounts of HA-SUMO-1 vector (0.05-0.5  $\mu$ g). Cells were either untreated (P-) or treated with progesterone (10 nM, P+) for 24 h, and cell extracts were measured for luciferase activity. (B) 293T cells were transfected with pMMTV luciferase reporter construct with Myc-PRB or Myc-PRB K388R vectors as indicated. The cells were then treated with progesterone (10 nM, 24 h) before harvesting; Mean  $\pm$  S.D. (n = 3)

### **Figure 2. Ligand-induced dimerization of PRB and its mutants.**

293T cells were co-transfected with expression vectors for Myc-PRB, HA-PRB, Myc-PRB K7/531R and HA-PRB K7/531R as indicated. Lysates from transfected cells were immunoprecipitated using an anti-Myc antibody and immunoprecipitates were probed with anti-HA and anti-Myc antibodies.

### **Figure 3. PIAS3 and PIASy induced PRB sumoylation.**

293T cells were transfected with HA-SUMO-1, Myc-PRB, Flag-PIAS3 or PIASy as indicated. Cells were treated, or not, with progesterone (100 nM, 2 h) prior to harvesting. Cell extracts were lysed with RIPA buffer and immunoblotted with an anti-Myc antibody.

**Figure 4. PIAS3 interacted with PRB and PRB mutants *in vivo*.**

293T cells were co-transfected with expression vectors for Myc-tagged PRB, its mutants (K388R, K7/531R or K7/388/531R) and HA-tagged PIAS3 as indicated. Lysates from transfected cells were immunoprecipitated using an anti-HA antibody and immunoprecipitates were probed with an anti-Myc antibody.

**Figure 5. PIAS3 C334S destabilized PRB retention in the nucleus.**

HeLa cells were cultured in medium containing charcoal-stripped serum then co-transfected with Myc-PRB and GFP-PIAS3 C334S, treated with progesterone (100 nM) for 0 or 2 h, and subjected to immunofluorescence staining with Myc-specific monoclonal antibody. *Scale bar*, 20  $\mu$ m. At least 300 transfected cells were scored for PRB subcellular distribution.
